# Supplementary material for: eIF4A2 drives repression of translation at initiation by Ccr4-Not through purine-rich motifs in the 5′UTR
Source: PubMed Central journal article supplement (PMC6886185; doi:10.1186/s13059-019-1857-2), 2019-12-02
Supplement: 13059_2019_1857_MOESM2_ESM.pdf [file 13059_2019_1857_MOESM2_ESM.pdf]

**Table S1. Adjusted p-values for enrichment of conserved miRNA family targets among mRNAs enriched in the RIP-seq experiments and following TNRC6 knockdown Table represents the numerical values and miRNA family names for represented graphically in Fig. 5C.**

| conserved miRNA family                                                                    | DDX6 & eIF4A2 | eIF4A2     | DDX6       | TNRC6      |
|-------------------------------------------------------------------------------------------|---------------|------------|------------|------------|
| miR-196abc                                                                                | 0.63421649    | 0.08776844 | 0.30536103 | 7.57E-05   |
| miR-216b/216b-5p                                                                          | 0.85822051    | 0.95246836 | 0.46791323 | 0.11798271 |
| miR-126-3p                                                                                | 0.64568697    | 0.05129455 | 0.55568456 | 0.05466153 |
| miR-122/122a/1352                                                                         | 0.69870867    | 0.88510233 | 0.59621293 | 0.00518091 |
| miR-191                                                                                   | 0.04675424    | 0.19375776 | 0.67378935 | 0.13638918 |
| miR-10abc/10a-5p                                                                          | 0.3693709     | 0.71415024 | 0.71833629 | 6.27E-08   |
| miR-499-5p                                                                                | 0.6229291     | 0.19328321 | 0.73126783 | 8.04E-05   |
| miR-99ab/100                                                                              | 0.62456261    | 0.46115437 | 0.75532763 | 0.0114281  |
| miR-24/24ab/24-3p                                                                         | 0.00066443    | 0.77339002 | 0.80765168 | 0.00033434 |
| miR-218/218a                                                                              | 0.14270163    | 0.50647564 | 0.8105381  | 1.96E-08   |
| miR-183                                                                                   | 0.57357324    | 0.35323984 | 0.84792688 | 3.56E-06   |
| miR-137/137ab                                                                             | 0.04119696    | 0.72050629 | 0.85339637 | 1.53E-15   |
| miR-21/590-5p                                                                             | 0.46573487    | 0.62433979 | 0.85811048 | 9.93E-10   |
| miR-216a                                                                                  | 0.99736583    | 0.86905695 | 0.88553305 | 0.20151329 |
| miR-155                                                                                   | 0.55331766    | 0.07639527 | 0.89224327 | 9.13E-05   |
| miR-33ab/33-5p                                                                            | 0.22431503    | 0.84043163 | 0.89915523 | 1.92E-06   |
| miR-219-5p/508/508-3p/4782-3p                                                             | 0.17416997    | 0.72598502 | 0.90072508 | 1.06E-13   |
| miR-490-3p                                                                                | 0.2800956     | 0.27508964 | 0.90305274 | 0.12718414 |
| miR-135ab/135a-5p                                                                         | 0.09996024    | 0.38344116 | 0.90826771 | 1.38E-11   |
| miR-208ab/208ab-3p                                                                        | 0.39866168    | 0.12375871 | 0.92015518 | 9.23E-07   |
| miR-142-3p                                                                                | 0.71518543    | 0.54395955 | 0.92245098 | 9.00E-12   |
| miR-138/138ab                                                                             | 0.02935179    | 0.03328175 | 0.92515405 | 1.67E-06   |
| miR-133abc                                                                                | 0.08150865    | 0.59289049 | 0.93243164 | 4.33E-08   |
| miR-184                                                                                   | 0.15987382    | 0.27909718 | 0.9391545  | 0.010051   |
| miR-33a-3p/365/365-3p                                                                     | 0.29043444    | 0.01852504 | 0.95247785 | 2.06E-09   |
| miR-143/1721/4770                                                                         | 0.66286951    | 0.36756283 | 0.95639211 | 0.00249107 |
| miR-383                                                                                   | 0.46356607    | 0.13675972 | 0.95892175 | 0.37146425 |
| miR-194                                                                                   | 0.52368093    | 0.26570075 | 0.95979151 | 0.00015442 |
| miR-124/124ab/506                                                                         | 0.06290108    | 0.95696045 | 0.96106003 | 1.40E-20   |
| miR-34ac/34bc-5p/449abc/449c-5p                                                           | 0.00011101    | 0.95092998 | 0.96134372 | 7.60E-09   |
| miR-22/22-3p                                                                              | 0.00060838    | 0.88496536 | 0.96194616 | 1.96E-05   |
| miR-503                                                                                   | 0.04419078    | 0.2403605  | 0.96258293 | 6.72E-23   |
| miR-25/32/92abc/363/363-3p/367                                                            | 0.05718001    | 0.20967743 | 0.96382102 | 7.70E-47   |
| miR-18ab/4735-3p                                                                          | 0.41659161    | 0.09060445 | 0.96730041 | 2.59E-08   |
| miR-139-5p                                                                                | 0.97986407    | 0.43214391 | 0.96870496 | 0.0003193  |
| miR-29abcd                                                                                | 0.05561036    | 0.22760598 | 0.9733345  | 2.40E-09   |
| miR-210                                                                                   | 0.05889326    | 0.59921187 | 0.9766741  | 0.01680871 |
| miR-190/190ab                                                                             | 0.45090144    | 0.42635317 | 0.9769718  | 0.00571111 |
| miR-375                                                                                   | 0.849498      | 0.13601692 | 0.97913966 | 0.00195001 |
| miR-200bc/429/548a                                                                        | 0.45535092    | 0.323934   | 0.98107455 | 3.18E-13   |
| miR-153                                                                                   | 0.08526926    | 0.84056723 | 0.98208039 | 9.61E-13   |
| miR-125a-5p/125b-5p/351/670/4319                                                          | 4.38E-06      | 0.16805592 | 0.98343926 | 7.74E-09   |
| miR-96/507/1271                                                                           | 0.10368578    | 0.63771687 | 0.98361521 | 2.05E-10   |
| miR-17/17-5p/20ab/20b-5p/93/106ab/427/518a-3p/519d                                        | 0.00979961    | 0.00198891 | 0.98438251 | 1.25E-95   |
| miR-7/7ab                                                                                 | 0.13280828    | 0.47169931 | 0.98493146 | 0.00665162 |
| miR-129-5p/129ab-5p                                                                       | 0.99980546    | 0.50154606 | 0.98566111 | 0.26443367 |
| miR-146ac/146b-5p                                                                         | 0.16715377    | 0.04502042 | 0.98611596 | 0.1297471  |
| miR-150/5127                                                                              | 0.00390768    | 0.14003036 | 0.98764428 | 0.91863968 |
| miR-148ab-3p/152                                                                          | 0.0258044     | 0.11770075 | 0.98811381 | 1.78E-16   |
| miR-217                                                                                   | 0.94112662    | 0.64897803 | 0.98832627 | 0.00025091 |
| miR-214/761/3619-5p                                                                       | 5.03E-07      | 0.11667412 | 0.9900362  | 6.98E-10   |
| miR-15abc/16/16abc/195/322/424/497/1907                                                   | 0.03213509    | 0.01610821 | 0.99146379 | 6.44E-33   |
| miR-31                                                                                    | 0.35126103    | 0.83149309 | 0.99150807 | 0.00110683 |
| miR-101/101ab                                                                             | 0.56524818    | 0.15082477 | 0.99262958 | 1.70E-17   |
| miR-187                                                                                   | 0.1773717     | 0.05970539 | 0.99366124 | 0.05781147 |
| miR-193/193b/193a-3p                                                                      | 0.82158147    | 0.51603414 | 0.99375474 | 1.84E-05   |
| miR-144                                                                                   | 0.63064315    | 0.04701553 | 0.99411879 | 1.68E-17   |
| miR-93/93a/105/106a/291a-3p/294/295/302abcde/372/373/428/519a/520be/520acd-3p/1378/1420ac | 0.09626413    | 0.0356846  | 0.99454894 | 7.21E-42   |
| miR-27abc/27a-3p                                                                          | 0.00814728    | 0.63959176 | 0.99455984 | 5.00E-15   |
| miR-140/140-5p/876-3p/1244                                                                | 0.5255503     | 0.71130038 | 0.99490515 | 6.34E-06   |
| miR-338/338-3p                                                                            | 0.02938005    | 0.43104066 | 0.99628449 | 0.15805476 |
| miR-182                                                                                   | 0.15954985    | 0.85935381 | 0.99666001 | 1.43E-11   |
| miR-132/212/212-3p                                                                        | 0.41693242    | 0.4834144  | 0.99715097 | 6.77E-09   |
| miR-455-5p                                                                                | 0.80607221    | 0.25975512 | 0.99779002 | 0.0011328  |
| miR-221/222/222ab/1928                                                                    | 0.62710441    | 0.22939568 | 0.99784841 | 1.63E-08   |
| miR-103a/107/107ab                                                                        | 0.23455387    | 0.05015705 | 0.99821661 | 3.94E-21   |
| miR-26ab/1297/4465                                                                        | 0.50942906    | 0.53545241 | 0.99824427 | 5.62E-18   |
| let-7/98/4458/4500                                                                        | 0.07489199    | 0.09590379 | 0.99870673 | 1.03E-13   |
| miR-30abcde/30abe-5p/384-5p                                                               | 0.16395544    | 0.51794032 | 0.99887812 | 1.39E-27   |
| miR-223                                                                                   | 0.8442671     | 0.05423629 | 0.99897155 | 0.00016754 |
| miR-9/9ab                                                                                 | 0.13462097    | 0.71085895 | 0.9990132  | 4.24E-16   |
| miR-205/205ab                                                                             | 0.50225503    | 0.26488827 | 0.99935164 | 3.78E-07   |
| miR-130ac/301ab/301b/301b-3p/454/721/4295/3666                                            | 0.03425468    | 0.05509918 | 0.99940899 | 2.32E-43   |
| miR-23abc/23b-3p                                                                          | 0.21778469    | 0.65279499 | 0.99942183 | 4.10E-10   |
| miR-128/128ab                                                                             | 0.00106361    | 0.40788502 | 0.99952282 | 2.67E-17   |
| miR-1ab/206/613                                                                           | 0.59903832    | 0.93070128 | 0.99955771 | 2.38E-12   |
| miR-425/425-5p/489                                                                        | 0.89022395    | 0.00524466 | 0.99961606 | 0.0184331  |
| miR-199ab-5p                                                                              | 0.32037299    | 0.09917452 | 0.99962374 | 2.36E-05   |
| miR-141/200a                                                                              | 0.91449454    | 0.07695385 | 0.99972127 | 7.31E-08   |
| miR-203                                                                                   | 0.94652409    | 0.1733933  | 0.99975095 | 0.00013203 |
| miR-181abcd/4262                                                                          | 0.13695843    | 0.73533667 | 0.99981649 | 5.29E-22   |
| miR-145                                                                                   | 0.41281691    | 0.49542161 | 0.9998379  | 2.49E-08   |
| miR-204/204b/211                                                                          | 0.59192609    | 0.03270783 | 0.99984511 | 0.00025059 |
| miR-19ab                                                                                  | 0.00710764    | 0.35596366 | 0.99997365 | 3.71E-71   |
| miR-192/215                                                                               | 0.76537551    | 0.33328964 | 1          | 0.00469772 |
| miR-451                                                                                   | 0.39238908    | 0.35271101 | 1          | 0.02607869 |

Table S2. Primers used in the study.

| Construct/Gene         | Primer name        | Sequence                                                   |
|------------------------|--------------------|------------------------------------------------------------|
| Flag-eIF4A1-PRRVAA     | 4A1_PRRVAA_F       | CTAGCACCCCGTCGAGTAGCGGCTCAGCAGATACAGAAGGTGG                |
|                        | 4A1_PRRVAA_R       | CCACCTTCTGTATCTGCTGAGCCGCTACTCGACGGGGTGCTAG                |
| Flag-eIF4A2-PRRVAA     | 4A2_PRRVAA_F       | GCACTAGTATTGGCCCCAGGAGAGTAGCGGCTCAACAGATCCAAAAGG           |
|                        | 4A2_PRRVAA_R       | CCTTTTGGATCTGTTGAGCCGCTACTCTCTGGGGCCAATACTAGTGC            |
| 4A1N-4A2C/4A2N-4A1C    | 4A1 E18 BamHI mutF | GACAATGGCCCCGATGGGATGGATCCCCGAAGGCGTC                      |
|                        | 4A1 E18 BamHI mutR | CTCTCGATGACGCCTTCGGGATCCATCCCATCG                          |
|                        | 4A2 D18 BamHI mutF | GGCGGCCAGAGGGAATGGATCCCGATGGTGTATC                         |
|                        | 4A2 D18 BamHI mutR | GCTCTCGATGACACCATCGGGATCCATTCCCTCTG                        |
| 4A1Δ1-16               | 4A1_16SallmutF     | GATCCAGAGACAATGGCGTCGACGGGATGGAGCCCGAAG                    |
|                        | 4A1_16SallmutR     | CTTCGGGCTCCATCCCGTCGACGCCATTGTCTCTGGATC                    |
| 4A2Δ1-13               | 4A2_13BamHlmutF    | GGATTATAACAGAGAACATGGATCCCCAGAGGGAATGG                     |
|                        | 4A2_13BamHlmutR    | CCATTCCCTCTGGGATCCATGTTCTCTGTTATAATCC                      |
| eIF4A2 point mutations | 4A2_E101A_F        | GATTGAGTTCAAGGCGACCCAAGCAC                                 |
|                        | 4A2_E101A_R        | GTGCTTGGGTCGCCTTGAACCTCAATC                                |
|                        | 4A2_N143A_A150M_F  | GGTGGAAACAAATGTTGAGCTGAAATGCAAAAAGTGCAGATGGAAGCACCACATATTG |
|                        | 4A2_N143A_A150M_R  | CAATATGTGGTCTCCATCTGCGATTTTTGCATTTTCAGCTCGAACATTTGTTCCACC  |
|                        | 4A2_S207N_I208T_F  | CCAAAACTAAACACAATACTCAGGTTGTGTTGG                          |
|                        | 4A2_S207N_I208T_R  | GCAACACAACCTGAGTATTTGTGTTTGAATTTTTGG                       |
| METTL3                 | METTL3_F           | GAAAGACTATCCCTGGCACTC                                      |
|                        | METTL3_R           | GTACCTTTGCTTGAACGTG                                        |
| TMEM68                 | TMEM68_F           | TGGTGAAGGAAAACAGTG                                         |
|                        | TMEM68_R           | TTATAAGTGTGGTCCATCTTC                                      |
| MYBL2                  | MYBL2_F            | ATTGTGGATGAGGATGTGAAG                                      |
|                        | MYBL2_R            | GAGGCTGGAAGAGTTGAAG                                        |
| PUM1                   | PUM1_F             | CGGAAGATCGTCATGCATAAG                                      |
|                        | PUM1_R             | CCAGAATGTGCTTGCCATAG                                       |
| ZC3H13                 | ZC3H13_F           | ATGATCGACGCCATGAAAG                                        |
|                        | ZC3H13_R           | TGTCATCTCTGTGGTCTCTAG                                      |
| PRRC2C                 | PRRC2C_F           | ACCAACATCTAGTCCCTTCC                                       |
|                        | PRRC2C_R           | GCTTCTGGTAGACAATGCTG                                       |
| ATXN2                  | ATXN2_F            | TCACACTTCAGATTTCAACCC                                      |
|                        | ATXN2_R            | CCTGACTGGTAGCGAGAAG                                        |
| PA2G4                  | PA2G4_F            | ACCATTATCCAGAATCCCACAG                                     |
|                        | PA2G4_R            | TTCTCTGCTCCTGCATCCTTG                                      |
| STX2                   | STX2_F             | CTTCAGTGGATCTTCGGATACG                                     |
|                        | STX2_R             | GTCTGTGCCTCATTGACTCC                                       |
| RAB12                  | RAB12_F            | GACAGAGAAATCACCAGGC                                        |
|                        | RAB12_R            | TCGTCCACATTGAAGTTATCC                                      |
| TIMM13                 | TIMM13_F           | ACAACCTCCGAGCAGAAGTG                                       |
|                        | TIMM13_R           | TGGAAATGAACAGGGTGGG                                        |
| CCNI                   | CCNI_F             | TGGAAAAGGCAATCACTAGGG                                      |
|                        | CCNI_R             | GTTTCTGGGTAAGGTTGAATTG                                     |
| ARPC2                  | ARPC2_F            | CAGCACAGTGTTAAGGATG                                        |
|                        | ARPC2_R            | GTGCTTTTCAGCTCCAGAG                                        |
| ZNF514                 | ZNF514_F           | TTCTGGGCCTTCTAGTATCC                                       |
|                        | ZNF514_R           | ACTTGGCATTGATTCTTGG                                        |
| DOCK5                  | DOCK5_F            | ACACCTATGGCCTCTATGTG                                       |
|                        | DOCK5_R            | CTGCCCAACGAATTAGATAG                                       |
| RPS21                  | RPS21_F            | TCCGCTAGCAATCGCATC                                         |
|                        | RPS21_R            | GACTCACCATCCTACGAATG                                       |
